## Case report

QJM

# Interferon- $\alpha$ treatment for acute myelitis and intestinal involvement in severe Behçet's disease

A. MONASTIRLI<sup>1</sup>, E. CHRONI<sup>2</sup>, S. GEORGIU<sup>1</sup>, J. ELLUL<sup>2</sup>, E. PASMATZI<sup>1</sup>,  
P. PAPATHANASOPOULOS<sup>2</sup> and D. TSAMBAOS<sup>1</sup>

From the <sup>1</sup>Department of Dermatology and <sup>2</sup>Department of Neurology, University of Patras, Rio-Patras, Greece

Address correspondence to Alexandra Monastirli, MD, Department of Dermatology, School of Medicine, University of Patras, PO Box 1413, Rio-Patras 26504, Greece. email: almonast@med.upatras.gr

## Case report

A 40-year-old HIV-negative Greek woman was admitted to the Department of Neurology at the University Medical Center of Patras with a 4-day history of progressive muscle weakness in her legs, accompanied by fever (39.5°C), diarrhea and urine retention and a 6-year history of oral and genital lesions that had relapsed 20 days prior to admission. Physical examination revealed multiple large aphthous lesions in the oral mucosa, extensive and deep anogenital ulcers, pseudofolliculitis and pathergy signs but no evidence of arthritis. Initial neurological examination showed muscle power grade 3/5 [Medical Research Council (MRC) scale] in the proximal and grade 4/5 in the distal muscles], brisk symmetrical tendon reflexes, extensor plantar response bilaterally, severe suppression of vibration sense below the knees (particularly on the right extremity) and bilateral reduction of pain appreciation below the T5 level. Neurological disability score in the expanded disability status scale (EDSS) was 6.5, indicating that bilateral assistance was required to walk 20 m. Cranial nerves and motor and sensory function of upper limbs were normal. Magnetic resonance imaging (MRI) of thoracic spinal cord revealed a long intramedullar lesion extending from C7 to T7 vertebrae with gadolinium-enhancement at T3–T4 level, whereas that of the brain showed three unenhanced small lesions at the brainstem (Figure 1). Cerebrospinal fluid analysis

revealed 60 lymphocytes/ml, normal protein and glucose content and negative oligoclonal bands.

Ophthalmologic investigation disclosed posterior uveitis and spotty hemorrhagic foci on both eyes, whereas colonoscopy showed multiple deep ulcers along the large bowel. Erythrocyte sedimentation rate was 70 mm/h, HLA B51 was positive, whereas serum protein electrophoresis revealed a decrease in albumin and an increase in alpha 1 and 2 globulins. All other biochemical, haematological and serological tests were either negative or within normal limits. Since the patient fulfilled the criteria of the International Study Group for Behçet's disease, the diagnosis of Behçet's disease (BD) was established.<sup>1</sup> The pre-treatment clinical severity score of the patient calculated according to Krause *et al.*<sup>2,3</sup> was 10 points.

The patient was initially treated with intravenous methylprednisolone pulse therapy (500 mg/day for 5 days) followed by oral 48 mg/day methylprednisolone on a 3-week oral tapering-off scheme. In view of our impressive therapeutic results with interferon- $\alpha$  (IFN- $\alpha$ ) monotherapy in a patient with neuro-Behçet<sup>4</sup> and of those reported by Çalgüneri *et al.*<sup>5</sup> with IFN- $\alpha$  combined with steroids+cyclophosphamide in a BD patient with transverse myelitis initially unresponsive to high-dose steroids, we decided to additionally apply IFN- $\alpha$  (Roferon; Roche Hellas, Athens, Greece) at a dose of  $3 \times 10^6$  IU/day, 3 times/week subcutaneously. However, after 13 days of combined treatment the patient's

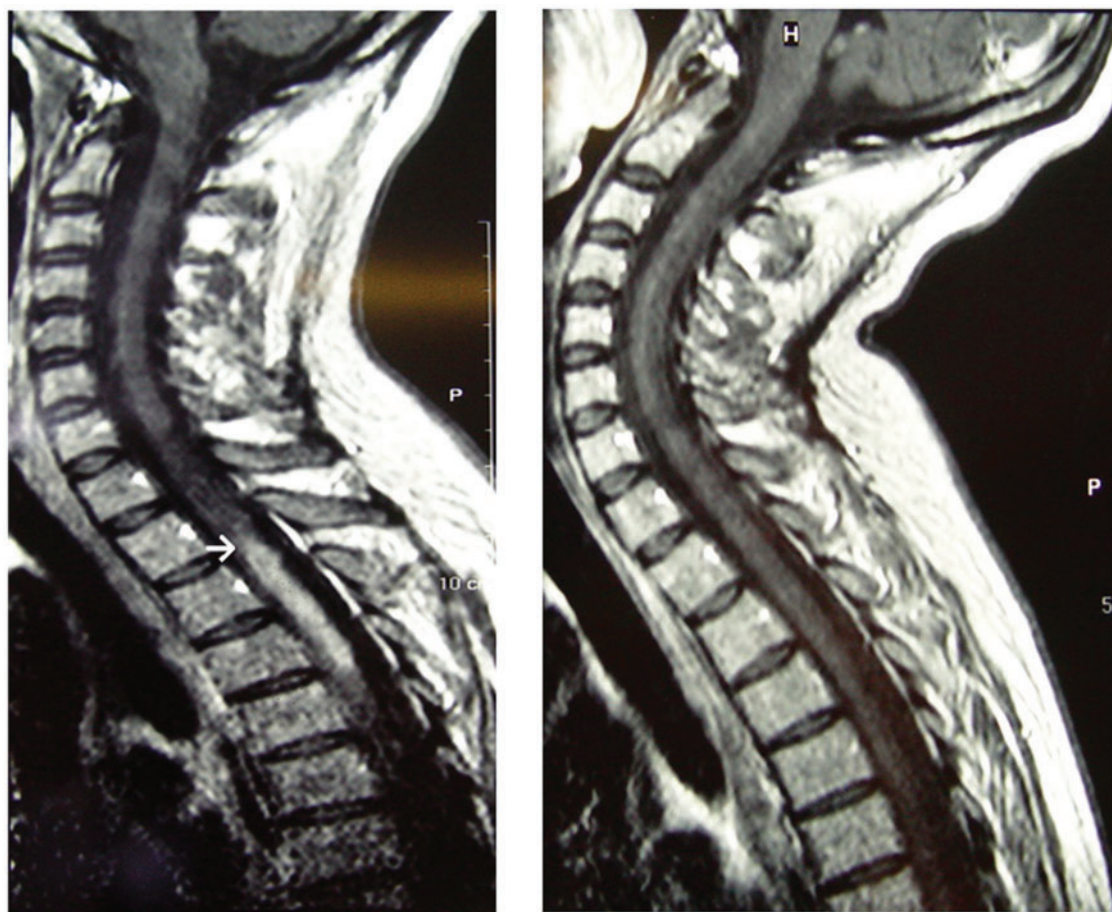

**Figure 1.** Magnetic resonance scan of the thoracic cord (sagittal T1-weighted images with gadolinium) showing the intramedullary enhanced lesion before (left image) and 1 month after treatment (right image).

neurological, intestinal and ocular manifestations revealed no significant change, whereas a massive progression of her mucocutaneous lesions led to her transfer to the Department of Dermatology where the IFN- $\alpha$  dose was increased to  $6 \times 10^6$  IU/day, 3 times/week. Already 9 days after this increase of IFN dosage there was an impressive improvement of the oral aphthous lesions, the anogenital and the intestinal ulcers, whereas a complete remission of the ophthalmological findings and a dramatic response of myelitis were observed. The patient was able to walk unaided and her pain sense was normalized. EDSS score was 1.5 indicating absence of disability but minimal signs of motor and sensory dysfunction. After 4 weeks of monotherapy with this IFN- $\alpha$  dosage the oral aphthous lesions, the anogenital and the intestinal ulcers revealed a complete remission, whereas after 6 further weeks of IFN- $\alpha$  monotherapy all neurological manifestations including urine retention had disappeared (EDSS score 0). Repeated MRI of thoracic spine showed an impressive reduction of the intramedullar non-enhanced lesion (restricted from T2 to T5). Apart from flu-like

syndrome (fever, chills and arthralgia) and transient leukopenia during IFN- $\alpha$  monotherapy no side effects were observed. After complete remission of all clinical manifestations, the patient received a maintenance IFN- $\alpha$  dosage ( $3 \times 10^6$  IU/day, 2 times/week) over a period of 8 months and then the IFN- $\alpha$  administration was discontinued. She has presently completed a 12-month drug-free follow-up without any relapse of her mucocutaneous, neurological, intestinal and ocular manifestations.

## Discussion

A wide spectrum of therapeutic agents has been employed over the years in the management of BD with varying success.<sup>6,7</sup> Tsambaos *et al.*<sup>8</sup> were the first to introduce the systemic application of IFN- $\alpha$  in the treatment of BD. Their impressive therapeutic results were confirmed in a large number of subsequent clinical trials.<sup>9–14</sup> Thus, IFN- $\alpha$  is presently regarded as a highly effective, safe and well tolerated form of therapy, particularly with regard to mucocutaneous

and ocular manifestations of BD. This has been confirmed in the patient presented herein, in which administration of IFN- $\alpha$ —despite tapering of steroids—led within 9 days to a complete remission of posterior uveitis and to an impressive improvement of the mucocutaneous lesions, which completely disappeared after 4 weeks of monotherapy with this cytokine. In view of the sparse data about the therapeutic effects of IFN- $\alpha$  on acute myelitis and intestinal involvement in BD, we will mainly concern ourselves herein with the discussion about the therapeutic response of these manifestations in our patient.

Transverse myelitis is a clinical syndrome characterized by an inflammatory process affecting the full width of spinal cord that leads to varying degrees of motor, sensory and autonomic dysfunction below the level of the lesion.<sup>15</sup> It is reportedly observed in 4–14% of patients with neuro-Behçet but its occurrence as the sole neurological manifestation of BD is rare.<sup>16–18</sup> Combined administration of systemic corticosteroids and immunosuppressants with or without colchicine, is the most commonly applied regimen in the management of transverse myelitis in BD; however, the efficacy of this therapeutic modality is far from being satisfactory; additionally, its use is associated with serious side effects.<sup>18–21</sup> A favourable therapeutic response of neurological manifestations has been reported in BD patients treated with IFN- $\alpha$ , either as monotherapy or in combination with colchicine or steroids.<sup>20,22</sup> Our group has shown that IFN- $\alpha$  administration to a patient with intractable epilepsy as the sole manifestation of neuro-Behçet resulted in a complete and persistent cessation of seizures despite discontinuation of all antiepileptic agents.<sup>4</sup> A BD patient with transverse myelitis initially unresponsive to high-dose steroids revealed a favourable response to the combined administration of steroids+cyclophosphamide with a high dosage of IFN- $\alpha$ .<sup>5</sup> In the patient presented herein, a 13-day combined treatment with high-dose steroids and low-dose IFN- $\alpha$  had no effect on myelitis; nevertheless, increase of IFN- $\alpha$  dose—despite tapering of steroids—led within 9 days to a dramatic response of myelitis, which disappeared after 10 weeks of monotherapy with the same IFN- $\alpha$  dosage.

Intestinal involvement is observed in about 1% of patients with BD,<sup>23</sup> but its prevalence in eastern Asia is much higher.<sup>24</sup> Despite their severe side effects, high-dose corticosteroids and immunosuppressants are regarded as the mainstay of treatment for intestinal BD, although there are many cases unresponsive to them. Kötter *et al.*<sup>25</sup> were the first to report the favourable therapeutic response of gastrointestinal vasculitis to IFN- $\alpha$  in a patient with BD. Our

group<sup>4</sup> observed complete remission of intestinal aphthous ulcers in a patient with neuro-BD after 9 weeks of IFN- $\alpha$  monotherapy. In the patient presented here, a 9-day combined application of IFN- $\alpha$  with corticosteroids followed by a 4-week IFN- $\alpha$  monotherapy led to a complete remission of her intestinal ulcers. After complete remission of all clinical manifestations the patient received a maintenance IFN- $\alpha$  dosage over a period of 8 months and then the IFN- $\alpha$  administration was discontinued. She has presently completed a 12-month drug-free follow-up without any relapse of her clinical manifestations.

A possible implication of the initially administered corticosteroids in the therapeutic response of our patient cannot be definitely ruled out; however, this possibility seems very unlikely in view of the prompt and impressive therapeutic response of all clinical manifestations upon increase of IFN- $\alpha$  dosage, suggesting that this well-tolerated cytokine may be solely or at least predominantly responsible for the observed complete resolution of myelitis, intestinal disease and of the other severe clinical manifestations in our BD patient. Our findings suggest that IFN- $\alpha$  may be a highly effective, safe and well tolerated form of therapy not only for severe mucocutaneous and ocular manifestations of BD but also for acute myelitis and intestinal ulcers. Undoubtedly, further studies on large numbers of patients are required to validate the efficacy and safety of IFN- $\alpha$  monotherapy as a possible first line option in the management of intestinal and neurological involvement and other severe manifestations in patients with BD.

*Conflict of interest:* None declared.

## References

1. Criteria for diagnosis of Behçet's disease. International Study Group for Behçet's disease. *Lancet* 1990; **335**:1078–80.
2. Krause I, Rosen Y, Kaplan I, Milo G, Guedj D, Molad Y, *et al.* Recurrent aphthous stomatitis in Behçet's disease: clinical features and correlation with systemic disease expression and severity. *J Oral Pathol Med* 1999a; **28**:193–6.
3. Krause I, Uziel Y, Guedj D, Milo G, Guedj D, Molad Y, *et al.* Childhood Behçet's disease: clinical features and comparison with adult-onset disease. *Rheumatology* 1999b; **38**: 457–62.
4. Chroni E, Monastirli A, Polychronopoulos P, Pasmazi E, Georgiou S, Vryzaki E, *et al.* Epileptic seizures as the sole manifestation of neuro-Behçet's disease: complete control under interferon-alpha treatment. *Seizure-Eur J Epilepsy* 2008; **17**:744–7.
5. Çalgüneri M, Onat AM, Öztürk MA, Özçakar L, Ureten K, Akdogan A, *et al.* Transverse myelitis in a patient with Behçet's disease: favorable outcome with a combination of interferon- $\alpha$ . *Clin Rheumatol* 2005; **24**:64–6.



6. Alpsoy E, Akman A. Behçet's disease: an algorithmic approach to its treatment. *Arch Dermatol Res* 2009; **301**:693–702.
7. van Daele PLA, Kappen JH, Hagen PM, van Laar JAM. Managing Behçet's disease: an update on current and emerging treatment options. *Ther Clin Risk Manag.* 2009; **5**: 385–90.
8. Tsambaos D, Eichelberg D, Goos M. Behçet's syndrome: treatment with recombinant leucocyte alpha-interferon. *Arch Dermatol Res* 1986; **278**:335–6.
9. Stadler R, Bratzke B, Baumann I. Behçet disease and exogenous interferon. A successful treatment study using recombinant alpha-A-IFN. *Hautarzt* 1987; **38**:97–100.
10. Zouboulis C, Treudler R, Orfanos CE. Adamantiades-Behçet disease. Therapeutic administration of systemic recombinant interferon-alpha-2a. *Hautarzt* 1993; **44**:440–5.
11. Azizlerli G, Sarica R, Köse A, Övül C, Kavala M, Kayabalt M, et al. Interferon alpha-2a in the treatment of Behçet's disease. *Dermatology* 1996; **192**:239–41.
12. Georgiou S, Monastirli A, Pasmatzis E, Gartaganis S, Goerz G, Tsambaos D. Efficacy and safety of systemic recombinant interferon-alpha in Behçet disease. *J Intern Med* 1998; **243**:367–72.
13. Alpsoy E, Durusoy C, Yilmaz E, Ozgurel Y, Ermis O, Yazar S, et al. Interferon alpha-2a in the treatment of Behçet disease. A randomized placebo-controlled-blind study. *Arch Dermatol* 2002; **138**:467–71.
14. Kötter I, Gümaydin I, Zierhut M, Stübiger N. The use of interferon  $\alpha$  in Behçet's disease: review of the literature. *Semin Arthrit Rheum* 2004; **33**:320–35.
15. Deshpande DM, Krishnan C, Kerr DA. Transverse myelitis after lumbar steroid injection in a patient with Behçet's disease. *Spinal Cord* 2005; **43**:735–7.
16. Akman-Demir G, Serdaroglu P, Tasci B. Clinical patterns of neurological involvement in Behçet's disease: evaluation of 200 patients. The Neuro-Behçet' Behçet Study Group. *Brain* 1999; **122**:2171–82.
17. Kidd D, Steuer A, Denman AM, Rudge P. Neurological complications in Behçet's syndrome. *Brain* 1999; **122**:2183–94.
18. Harmouche H, Mouti O, El-Faris M, Aidi S, Benabdeljalil M, Chkili T. Acute myelitis and Behçet's disease: three case reports. *Rev. Med. Interne* 2000; **21**:1047–51.
19. Yesilot N, Mutlu M, Gungor O, Baykai B, Serdaroglu P, Akman-Demir G. Clinical characteristics and course of spinal cord involvement in Behçet's disease. *Eur J Neurol* 2007; **14**:729–37.
20. Kuemmerle-Deschner JB, Tzaribachev N, Deuter C, Zierhut M, Batra M, Koetter I. Interferon- $\alpha$  –a new therapeutic option in refractory juvenile Behçet's disease with CNS involvement. *Rheumatol* 2008; **47**:1051–3.
21. Al-Araji A, Kidd DP. Neuro- Behçet's disease: epidemiology, clinical characteristics and management. *Lancet Neurol* 2009; **8**:192–204.
22. Nichols JC, Ince A, Akduman L, Mann ES. Interferon-alpha 2a treatment of neuro-Behçet disease. *J Neuroophthalmol* 2001; **21**:109–11.
23. Smith JA, Siddiqui D. Intestinal Behçet's disease presenting as a massive acute lower gastrointestinal bleed. *Dig Dis Sci* 2002; **47**:517–21.
24. Imamura Y, Kurokawa MS, Yoshikawa H, Nara K, Takada E, Masuda C, et al. Involvement of Th1 cells and heat shock protein 60 in the pathogenesis of intestinal Behçet's disease. *Clin Exp Immunol* 2005; **139**:371–8.
25. Kötter I, Stübiger N, gadolinium Eckstein AK, Helligenhaus A, Günaydin I, Jacki SH. Treatment of ocular Behçet's disease (BD) with recombinant human interferon alpha 2 $\alpha$  (rhIFN $\alpha$ -2a): a three center pilot study [abstract]. *Arthritis Rheum* 1998; **41**(Suppl):S355.
